# Supplementary material
Source: publisher figshare collection journal article supplement (https://acs.figshare.com/ndownloader/files/4568215)
Supplement: Supplementary file 1 [file 4568215]

data_ltp95

 

_audit_creation_method            SHELXL-97

_chemical_name_systematic

;

 ?

;

_chemical_name_common             ?

_chemical_melting_point           ?

_chemical_formula_moiety          'C17 H20 Cl N O'

_chemical_formula_sum

 'C17 H20 Cl N O'

_chemical_formula_weight          289.79

 

loop_

 _atom_type_symbol

 _atom_type_description

 _atom_type_scat_dispersion_real

 _atom_type_scat_dispersion_imag

 _atom_type_scat_source

 'C'  'C'   0.0033   0.0016

 'International Tables Vol C Tables 4.2.6.8 and 6.1.1.4'

 'H'  'H'   0.0000   0.0000

 'International Tables Vol C Tables 4.2.6.8 and 6.1.1.4'

 'N'  'N'   0.0061   0.0033

 'International Tables Vol C Tables 4.2.6.8 and 6.1.1.4'

 'O'  'O'   0.0106   0.0060

 'International Tables Vol C Tables 4.2.6.8 and 6.1.1.4'

 'Cl'  'Cl'   0.1484   0.1585

 'International Tables Vol C Tables 4.2.6.8 and 6.1.1.4'

 

_symmetry_cell_setting            Trigonal

_symmetry_space_group_name_H-M    R-3

 

loop_

 _symmetry_equiv_pos_as_xyz

 'x, y, z'

 '-y, x-y, z'

 '-x+y, -x, z'

 'x+2/3, y+1/3, z+1/3'

 '-y+2/3, x-y+1/3, z+1/3'

 '-x+y+2/3, -x+1/3, z+1/3'

 'x+1/3, y+2/3, z+2/3'

 '-y+1/3, x-y+2/3, z+2/3'

 '-x+y+1/3, -x+2/3, z+2/3'

 '-x, -y, -z'

 'y, -x+y, -z'

 'x-y, x, -z'

 '-x+2/3, -y+1/3, -z+1/3'

 'y+2/3, -x+y+1/3, -z+1/3'

 'x-y+2/3, x+1/3, -z+1/3'

 '-x+1/3, -y+2/3, -z+2/3'

 'y+1/3, -x+y+2/3, -z+2/3'

 'x-y+1/3, x+2/3, -z+2/3'

 

_cell_length_a                    29.6684(3)

_cell_length_b                    29.6684(3)

_cell_length_c                    9.2429(3)

_cell_angle_alpha                 90.00

_cell_angle_beta                  90.00

_cell_angle_gamma                 120.00

_cell_volume                      7045.7(2)

_cell_formula_units_Z             18

_cell_measurement_temperature     173(2)

_cell_measurement_reflns_used     5669

_cell_measurement_theta_min       2.38

_cell_measurement_theta_max       29.29

 

_exptl_crystal_description        prism

_exptl_crystal_colour             colourless

_exptl_crystal_size_max           0.30

_exptl_crystal_size_mid           0.28

_exptl_crystal_size_min           0.26

_exptl_crystal_density_meas       ?

_exptl_crystal_density_diffrn     1.229

_exptl_crystal_density_method     'not measured'

_exptl_crystal_F_000              2772

_exptl_absorpt_coefficient_mu     0.240

_exptl_absorpt_correction_type    multi-scan

_exptl_absorpt_correction_T_min   0.9316

_exptl_absorpt_correction_T_max   0.9403

_exptl_absorpt_process_details    sadabs

 

_exptl_special_details

;

 ?

;

 

_diffrn_ambient_temperature       173(2)

_diffrn_radiation_wavelength      0.71073

_diffrn_radiation_type            MoK\a

_diffrn_radiation_source          'fine-focus sealed tube'

_diffrn_radiation_monochromator   graphite

_diffrn_measurement_device_type   'CCD area detector'

_diffrn_measurement_method        'phi and omega scans'

_diffrn_detector_area_resol_mean  ?

_diffrn_standards_number          ?

_diffrn_standards_interval_count  ?

_diffrn_standards_interval_time   ?

_diffrn_standards_decay_%         ?

_diffrn_reflns_number             45211

_diffrn_reflns_av_R_equivalents   0.0421

_diffrn_reflns_av_sigmaI/netI     0.0249

_diffrn_reflns_limit_h_min        -43

_diffrn_reflns_limit_h_max        43

_diffrn_reflns_limit_k_min        -43

_diffrn_reflns_limit_k_max        43

_diffrn_reflns_limit_l_min        -13

_diffrn_reflns_limit_l_max        13

_diffrn_reflns_theta_min          2.75

_diffrn_reflns_theta_max          31.21

_reflns_number_total              5073

_reflns_number_gt                 3910

_reflns_threshold_expression      >2sigma(I)

 

_computing_data_collection        'Bruker SMART'

_computing_cell_refinement        'Bruker SMART'

_computing_data_reduction         'Bruker SAINT'

_computing_structure_solution     'SHELXS-97 (Sheldrick, 1990)'

_computing_structure_refinement   'SHELXL-97 (Sheldrick, 1997)'

_computing_molecular_graphics     'Bruker SHELXTL'

_computing_publication_material   'Bruker SHELXTL'

 

_refine_special_details

;

 Refinement of F^2^ against ALL reflections.  The weighted R-factor wR and

 goodness of fit S are based on F^2^, conventional R-factors R are based

 on F, with F set to zero for negative F^2^. The threshold expression of

 F^2^ > 2sigma(F^2^) is used only for calculating R-factors(gt) etc. and is

 not relevant to the choice of reflections for refinement.  R-factors based

 on F^2^ are statistically about twice as large as those based on F, and R-

 factors based on ALL data will be even larger.

;

 

_refine_ls_structure_factor_coef  Fsqd

_refine_ls_matrix_type            full

_refine_ls_weighting_scheme       calc

_refine_ls_weighting_details

 'calc w=1/[\s^2^(Fo^2^)+(0.0485P)^2^+7.8332P] where P=(Fo^2^+2Fc^2^)/3'

_atom_sites_solution_primary      direct

_atom_sites_solution_secondary    difmap

_atom_sites_solution_hydrogens    geom

_refine_ls_hydrogen_treatment     constr

_refine_ls_extinction_method      none

_refine_ls_extinction_coef        ?

_refine_ls_number_reflns          5073

_refine_ls_number_parameters      184

_refine_ls_number_restraints      0

_refine_ls_R_factor_all           0.0599

_refine_ls_R_factor_gt            0.0415

_refine_ls_wR_factor_ref          0.1191

_refine_ls_wR_factor_gt           0.1074

_refine_ls_goodness_of_fit_ref    1.077

_refine_ls_restrained_S_all       1.077

_refine_ls_shift/su_max           0.001

_refine_ls_shift/su_mean          0.000

 

loop_

 _atom_site_label

 _atom_site_type_symbol

 _atom_site_fract_x

 _atom_site_fract_y

 _atom_site_fract_z

 _atom_site_U_iso_or_equiv

 _atom_site_adp_type

 _atom_site_occupancy

 _atom_site_symmetry_multiplicity

 _atom_site_calc_flag

 _atom_site_refinement_flags

 _atom_site_disorder_assembly

 _atom_site_disorder_group

C1 C 0.90073(5) 0.99396(5) 0.25330(13) 0.0247(2) Uani 1 1 d . . .

C2 C 0.87516(5) 0.97335(5) 0.38247(13) 0.0280(3) Uani 1 1 d . . .

H2 H 0.8887 0.9914 0.4709 0.034 Uiso 1 1 calc R . .

C3 C 0.82939(5) 0.92576(5) 0.38039(13) 0.0262(2) Uani 1 1 d . . .

H3 H 0.8116 0.9114 0.4687 0.031 Uiso 1 1 calc R . .

C4 C 0.80890(5) 0.89852(5) 0.25227(13) 0.0230(2) Uani 1 1 d . . .

C5 C 0.83582(5) 0.92060(5) 0.12381(13) 0.0265(2) Uani 1 1 d . . .

H5 H 0.8226 0.9026 0.0351 0.032 Uiso 1 1 calc R . .

C6 C 0.88154(5) 0.96834(5) 0.12362(13) 0.0260(2) Uani 1 1 d . . .

H6 H 0.8994 0.9832 0.0356 0.031 Uiso 1 1 calc R . .

C7 C 0.75801(5) 0.84716(5) 0.25627(14) 0.0244(2) Uani 1 1 d . . .

H7 H 0.7531 0.8353 0.3592 0.029 Uiso 1 1 calc R . .

C8 C 0.75872(5) 0.80364(5) 0.16719(17) 0.0322(3) Uani 1 1 d . . .

H8 H 0.7677 0.8156 0.0647 0.039 Uiso 1 1 calc R . .

C9 C 0.80041(7) 0.79299(7) 0.2280(2) 0.0472(4) Uani 1 1 d . . .

H9A H 0.8347 0.8244 0.2187 0.071 Uiso 1 1 calc R . .

H9B H 0.8001 0.7644 0.1739 0.071 Uiso 1 1 calc R . .

H9C H 0.7932 0.7833 0.3303 0.071 Uiso 1 1 calc R . .

C10 C 0.70592(6) 0.75354(6) 0.1699(2) 0.0463(4) Uani 1 1 d . . .

H10A H 0.7088 0.7257 0.1211 0.069 Uiso 1 1 calc R . .

H10B H 0.6801 0.7593 0.1198 0.069 Uiso 1 1 calc R . .

H10C H 0.6950 0.7435 0.2704 0.069 Uiso 1 1 calc R . .

C11 C 0.71371(5) 0.87401(6) 0.07505(14) 0.0299(3) Uani 1 1 d . . .

H11A H 0.7213 0.8542 0.0024 0.036 Uiso 1 1 calc R . .

H11B H 0.7422 0.9107 0.0714 0.036 Uiso 1 1 calc R . .

C12 C 0.66304(5) 0.87135(5) 0.03766(14) 0.0275(3) Uani 1 1 d . . .

C13 C 0.62120(6) 0.82549(6) -0.01442(15) 0.0318(3) Uani 1 1 d . . .

H13 H 0.6245 0.7955 -0.0253 0.038 Uiso 1 1 calc R . .

C14 C 0.57457(6) 0.82304(7) -0.05073(16) 0.0378(3) Uani 1 1 d . . .

H14 H 0.5464 0.7914 -0.0863 0.045 Uiso 1 1 calc R . .

C15 C 0.56910(6) 0.86617(7) -0.03543(18) 0.0438(4) Uani 1 1 d . . .

H15 H 0.5373 0.8645 -0.0609 0.053 Uiso 1 1 calc R . .

C16 C 0.60998(8) 0.91169(7) 0.0171(2) 0.0482(4) Uani 1 1 d . . .

H16 H 0.6062 0.9415 0.0286 0.058 Uiso 1 1 calc R . .

C17 C 0.65679(6) 0.91441(6) 0.05345(18) 0.0394(3) Uani 1 1 d . . .

H17 H 0.6848 0.9461 0.0895 0.047 Uiso 1 1 calc R . .

Cl1 Cl 0.959024(15) 1.052729(14) 0.25391(4) 0.04085(11) Uani 1 1 d . . .

N1 N 0.71206(4) 0.85271(4) 0.21978(11) 0.0236(2) Uani 1 1 d . . .

O1 O 0.71332(4) 0.89104(4) 0.31976(10) 0.0271(2) Uani 1 1 d . . .

H1 H 0.6884 0.8764 0.3781 0.041 Uiso 1 1 calc R . .

 

loop_

 _atom_site_aniso_label

 _atom_site_aniso_U_11

 _atom_site_aniso_U_22

 _atom_site_aniso_U_33

 _atom_site_aniso_U_23

 _atom_site_aniso_U_13

 _atom_site_aniso_U_12

C1 0.0227(5) 0.0237(6) 0.0240(5) 0.0024(4) 0.0011(4) 0.0090(5)

C2 0.0304(6) 0.0292(6) 0.0193(5) 0.0005(5) -0.0011(5) 0.0112(5)

C3 0.0269(6) 0.0294(6) 0.0203(5) 0.0047(4) 0.0027(4) 0.0125(5)

C4 0.0201(5) 0.0252(6) 0.0242(5) 0.0013(4) 0.0022(4) 0.0118(5)

C5 0.0227(6) 0.0304(6) 0.0220(5) -0.0024(5) 0.0018(4) 0.0101(5)

C6 0.0233(6) 0.0297(6) 0.0215(5) 0.0016(5) 0.0037(4) 0.0106(5)

C7 0.0206(5) 0.0245(6) 0.0270(6) 0.0010(4) 0.0036(4) 0.0103(5)

C8 0.0271(6) 0.0277(6) 0.0410(7) -0.0034(5) 0.0058(5) 0.0130(5)

C9 0.0395(9) 0.0412(9) 0.0703(12) -0.0041(8) 0.0020(8) 0.0273(7)

C10 0.0354(8) 0.0288(7) 0.0696(12) -0.0134(7) 0.0069(8) 0.0123(6)

C11 0.0242(6) 0.0385(7) 0.0250(6) 0.0036(5) 0.0041(5) 0.0143(5)

C12 0.0251(6) 0.0329(6) 0.0237(5) 0.0042(5) 0.0033(5) 0.0139(5)

C13 0.0312(7) 0.0348(7) 0.0288(6) -0.0012(5) -0.0005(5) 0.0160(6)

C14 0.0276(7) 0.0466(9) 0.0317(7) 0.0028(6) -0.0013(5) 0.0130(6)

C15 0.0344(8) 0.0616(11) 0.0419(8) 0.0114(8) 0.0022(6) 0.0290(8)

C16 0.0542(10) 0.0479(10) 0.0568(10) 0.0058(8) 0.0004(8) 0.0362(9)

C17 0.0406(8) 0.0321(7) 0.0446(8) 0.0015(6) -0.0027(7) 0.0175(6)

Cl1 0.03500(19) 0.03364(19) 0.02863(17) -0.00042(13) 0.00224(13) -0.00180(14)

N1 0.0214(5) 0.0250(5) 0.0238(5) -0.0013(4) 0.0029(4) 0.0111(4)

O1 0.0247(4) 0.0248(4) 0.0298(5) -0.0030(3) 0.0055(3) 0.0109(4)

 

_geom_special_details

;

 All esds (except the esd in the dihedral angle between two l.s. planes)

 are estimated using the full covariance matrix.  The cell esds are taken

 into account individually in the estimation of esds in distances, angles

 and torsion angles; correlations between esds in cell parameters are only

 used when they are defined by crystal symmetry.  An approximate (isotropic)

 treatment of cell esds is used for estimating esds involving l.s. planes.

;

 

loop_

 _geom_bond_atom_site_label_1

 _geom_bond_atom_site_label_2

 _geom_bond_distance

 _geom_bond_site_symmetry_2

 _geom_bond_publ_flag

C1 C6 1.3806(18) . ?

C1 C2 1.3824(17) . ?

C1 Cl1 1.7365(13) . ?

C2 C3 1.3859(18) . ?

C3 C4 1.3906(17) . ?

C4 C5 1.3976(17) . ?

C4 C7 1.5173(17) . ?

C5 C6 1.3874(18) . ?

C7 N1 1.4913(16) . ?

C7 C8 1.5403(18) . ?

C8 C10 1.528(2) . ?

C8 C9 1.528(2) . ?

C11 N1 1.4698(17) . ?

C11 C12 1.5055(19) . ?

C12 C17 1.387(2) . ?

C12 C13 1.391(2) . ?

C13 C14 1.390(2) . ?

C14 C15 1.375(2) . ?

C15 C16 1.376(3) . ?

C16 C17 1.391(2) . ?

N1 O1 1.4510(13) . ?

 

loop_

 _geom_angle_atom_site_label_1

 _geom_angle_atom_site_label_2

 _geom_angle_atom_site_label_3

 _geom_angle

 _geom_angle_site_symmetry_1

 _geom_angle_site_symmetry_3

 _geom_angle_publ_flag

C6 C1 C2 121.48(12) . . ?

C6 C1 Cl1 119.03(10) . . ?

C2 C1 Cl1 119.48(10) . . ?

C1 C2 C3 118.70(12) . . ?

C2 C3 C4 121.65(11) . . ?

C3 C4 C5 118.02(11) . . ?

C3 C4 C7 119.29(11) . . ?

C5 C4 C7 122.67(11) . . ?

C6 C5 C4 121.16(12) . . ?

C1 C6 C5 118.98(11) . . ?

N1 C7 C4 112.91(10) . . ?

N1 C7 C8 111.60(10) . . ?

C4 C7 C8 113.89(10) . . ?

C10 C8 C9 109.56(13) . . ?

C10 C8 C7 111.69(11) . . ?

C9 C8 C7 109.18(13) . . ?

N1 C11 C12 111.63(10) . . ?

C17 C12 C13 118.18(13) . . ?

C17 C12 C11 121.15(13) . . ?

C13 C12 C11 120.67(13) . . ?

C14 C13 C12 120.86(14) . . ?

C15 C14 C13 120.27(15) . . ?

C14 C15 C16 119.56(15) . . ?

C15 C16 C17 120.45(16) . . ?

C12 C17 C16 120.68(15) . . ?

O1 N1 C11 105.10(10) . . ?

O1 N1 C7 106.00(9) . . ?

C11 N1 C7 114.69(10) . . ?

 

_diffrn_measured_fraction_theta_max    0.994

_diffrn_reflns_theta_full              31.21

_diffrn_measured_fraction_theta_full   0.994

_refine_diff_density_max    0.348

_refine_diff_density_min   -0.377

_refine_diff_density_rms    0.050
